# Supplementary material
Source: PubMed Central journal article supplement (PMC7363137)
Supplement: supp_RA120.013590_159698_2_supp_526615_q9z0zv.pdf [file supp_RA120.013590_159698_2_supp_526615_q9z0zv.pdf]

## **Supporting Information**

### **Selective MAP kinases proteolysis determined by activation loop flexibility**

Lihi Gur-Arie<sup>1</sup>, Maayan Eitan-Wexler<sup>2</sup>, Nina Weinberger<sup>2</sup>, Ilan Rosenshine<sup>1</sup>, Oded Livnah<sup>2</sup>

<sup>1</sup>Department Microbiology and Molecular Genetics, IMRIC, Faculty of Medicine, and

<sup>2</sup>Department of Biological Chemistry, Alexander Silverman Institute of Life Sciences, The Wolfson Centre for Applied Structural Biology, The Edmond J. Safra Campus, The Hebrew University of Jerusalem.

|                                    |                                                                     |
|------------------------------------|---------------------------------------------------------------------|
| Hamiltonella defensa (HD)          | MR-RALKLNLTPLSFSS-----SSNSDTDIQSLVKKSSVNWIKNNHQLSFDGTNKN            |
| Erwinia_piriflorinigrans           | MRPTSLQLTQPVNLPLPSS-----DPASDIQSLVKISGVNWNINNNQQLSFIGDTYKN          |
| Shigella_boydii                    | MRPTSLNLALHQSS-----TSSMSDADIESLVKTSVQWIKNNPQLRFQGTDDHNI             |
| Enterohemorrhagic E.coli (EHEC)    | MRPTSLNLVHLHQSS-----RSSMSDTDIESLVKASSVQWIKNNPQLRFQGTDDHNI           |
| Enteropathogenic E.coli (EPEC)     | MRPTSLNLVHLHQSS-----TSSMSDTDIESLVKASSVQWIKNNPQLRFQGTDDHNI           |
| Escherichia_albertii               | MRPTSLNLALHQSS-----TSSMSDTDIESLVKASSVQWIKNNPQLRFQGTDDHNI            |
| Providencia_alcalifaciens          | MRPTSLKLTLPSPSTSSS-----HSSSATDIQYLVKMSVSWIKNNQQLHFLGTDHKI           |
| Izhakiella_capsodis                | MRPTFLNLTSPSSSLPFSNSNSNSNSTSTTDIQSLVKMSRVHWVKNQQLCFHGTDHKI          |
| Salmonella_enterica_arizonae (SEA) | MRPTSLKLTLPSPSTSSS-----NS--ATDIQSLVKRSGVRWIKNNQQLSFIGTDHKI          |
| Pantoea_stewartii                  | MRPTSLNLVHLPS--HLPSSS-----NSISATDVQSLVKMSSVLWIKNNQQLCFHGTDHKI       |
| Salmonella_enterica_Sandiego       | MRPTSLKLTLPSPSTSSS-----NSISATDIQSLVKRSGVRWVKNQQLSFIGTDYKI           |
| Leclercia                          | MRPTSLNLTLPSLPSPSS-----NSISATDIQSHVKMSGVHWVKNQQLCFHGTDLKI           |
| Salmonella_enterica_Braenderup     | MRPTSLNLTLPSLPSPSS-----NSVSATDIQSLVKMSGVRWVKNQQLCFHGADLKI           |
| Salmonella_enterica_salamae        | MRPTSLNLTLPSLPSPSS-----NSVSATDIQSLVKMSGVRWVKNQQLCFHGADLKI           |
| Citrobacter_rodentium (CR)         | MRPTSLNLTLPSLPSPSS-----NSISATDIQSLVKMSGVRWVKNQQLCFHGTDLKI           |
| Erwinia_tracheiphila               | MRPTSLNLTLPSLPSPSS-----NSISATDIQSLVKISGVVWVKNQQLCFHGTDLKI           |
|                                    | ** *:* *:: ** * * * : ** * * * * : *                                |
|                                    |                                                                     |
| Hamiltonella defensa (HD)          | YQRLEKALDKIESTETGKELLNCIESVSRKSEKLIIRLDSTELGVTAHCAENAENFRGT         |
| Erwinia_piriflorinigrans           | YRQLETALDKVKSNTGRTLLKCIALTSQLKSKLAIIFLNSEELMVEPHCKTDAENFRGT         |
| Shigella_boydii                    | YQQTAAALDKIGSTETGRVLLNAIESISRLKSETVVIHLSNSSLGVIHAHRDIDAENHRGT       |
| Enterohemorrhagic E.coli (EHEC)    | YQQTAAALDKIGSTETGRVLLNAIESISRLKSETVVIHLSNSSLGVIHAHRDIDAENHRGT       |
| Enteropathogenic E.coli (EPEC)     | YQQTAAALDKIGSTETGRVLLNAIESISRLKSETVVIHLSNSSLGVIHAHRDIDAENHRGT       |
| Escherichia_albertii               | YQQTAAALDKIGSTETGRVLLNAIESISRLKSETVVIHLSNSSLGVIHAHRDIDAENHRGT       |
| Providencia_alcalifaciens          | YQKLEAALDKIESTNTGRILLNSELTSRLKSEKLVIIHLSSELGVIHAHCNTDAENSRGT        |
| Izhakiella_capsodis                | YQHLEAALDKIESTDTGRTLLNCIELTSRLKSEKLAIIYLNCTELMVAHCADDAENSRGT        |
| Salmonella_enterica_arizonae (SEA) | YQQLAALDKIESTDTGRTLLKCIELTSQLKSEKLAIIHLSAELGVVAHCNTDAENARGT         |
| Pantoea_stewartii                  | YQQLAALDKIESTNTGRTLLNGIGLTSRLKSEKLAIIHLSAELGVVAHCNTDAENFRGT         |
| Salmonella_enterica_Sandiego       | YQQLAALDKIESTDTGRTLLNCIELTSRLKSEKLEIHLNSAELGVVAHCNTDAENSRGT         |
| Leclercia                          | YQHLEAALDKIESTDTGRTLLNCIELTSRLKSEKLAIIHLSAELGVVAHCNTDAENSRGT        |
| Salmonella_enterica_Braenderup     | YQHLEAALDKIESTDTGRTLLNCIELTSRLKSEKLAIIHLSAELGVVAHCNTDAENSRGT        |
| Salmonella_enterica_salamae        | YQHLEAALDKIESTDTGRTLLNCIELTSRLKSEKLAIIHLSAELGVVAHCNTDAENSRGT        |
| Citrobacter_rodentium (CR)         | YQHLEAALDKIESTDTGRTLLNCIELTSRLKSEKLAIIHLSAELGVVAHCNTDAENSRGT        |
| Erwinia_tracheiphila               | YKHLAALDKIESTDTGRTLLNCIELTSRLKSEKLAIIHLSAELGVVAHCNTDAENSRGT         |
|                                    | *::* ****: **:*: ** * * * :***:.. * *:. . * * * :*** **             |
|                                    |                                                                     |
| Hamiltonella defensa (HD)          | GSYLHCLNLSVQEEESIGKIGQTELDACIVHELLHVFNHNLNGERLKVAVFQPEVETYS         |
| Erwinia_piriflorinigrans           | GSDDFHCNFDVAE-YFFDQGMDLVEFQACVVEHELLHVFNHNLNGERLKVAVFQPEVETYS       |
| Shigella_boydii                    | GSDDFHCNNAVE-YPCGEGISVVDVFHATIVHELLHVFNHNLNGERLKVAVFQPEVETYS        |
| Enterohemorrhagic E.coli (EHEC)    | GSDDFHCNNAVE-YPCGEGISVVDVFHATIVHELLHVFNHNLNGERLKVAVFQPEVETYS        |
| Enteropathogenic E.coli (EPEC)     | GSDDFHCNNAVE-YPCGEGISVVDVFHATIVHELLHVFNHNLNGERLKVAVFQPEVETYS        |
| Escherichia_albertii               | GSDDFHCNNAVE-YPCGEGISVVDVFHATIVHELLHVFNHNLNGERLKVAVFQPEVETYS        |
| Providencia_alcalifaciens          | GSDDFHCNNAVE-YPCGQGISLVDVFHACIVHELLHVFNHNLNGERLKVAVFQPEVETYS        |
| Izhakiella_capsodis                | GSNFHCNNAVE-YPCGQGISLVDVFHACIVHELLHVFNHNLNGERLKVAVFQPEVETYS         |
| Salmonella_enterica_arizonae (SEA) | GSDDFHCNNAVE-YPCGQGISLVDVFHACIVHELLHVFNHNLNGERLKVAVFQPEVETYS        |
| Pantoea_stewartii                  | GSDDFHCNNAVE-YPCGQGISLVDVFHACIVHELLHVFNHNLNGERLKVAVFQPEVETYS        |
| Salmonella_enterica_Sandiego       | GSDDFHCNNAVE-YPCGQGISLVDVFHACIVHELLHVFNHNLNGERLKVAVFQPEVETYS        |
| Leclercia                          | GSDDFHCNNAVE-YPCGQGISLVDVFHACIVHELLHVFNHNLNGERLKVAVFQPEVETYS        |
| Salmonella_enterica_Braenderup     | GSDDFHCNNAVE-YPCGQGISLVDVFHACIVHELLHVFNHNLNGERLKVAVFQPEVETYS        |
| Salmonella_enterica_salamae        | GSDDFHCNNAVE-YPCGQGISLVDVFHACIVHELLHVFNHNLNGERLKVAVFQPEVETYS        |
| Citrobacter_rodentium (CR)         | GSDDFHCNNAVE-YPCGQGISLVDVFHACIVHELLHVFNHNLNGERLKVAVFQPEVETYS        |
| Erwinia_tracheiphila               | GSDDFHCNNAVE-YPCQGISLVDVFHACIVHELLHVFNHNLNGERLKVAVFQPEVETYS         |
|                                    | ** :***:.* :. . :... * *****:***** : * :.                           |
|                                    |                                                                     |
| Hamiltonella defensa (HD)          | FLLEEARTVGLGSFSEEVLSENKFREEIGIPRRVSYAHESLIHDDNTFTMFFENKQSHPLL       |
| Erwinia_piriflorinigrans           | LLLEEARTVGLGFFSSEYLSENKFRKEIGAPRRTSYPYDFYIVNDNTITMGYERKKLHPLL       |
| Shigella_boydii                    | LLLEEARTVGLGAFSEEVLSENKFREEIGMPRRTSYPHDSALIHDDNTVSLGQVRLHPLL        |
| Enterohemorrhagic E.coli (EHEC)    | LLLEEARTVGLGAFSEEVLSENKFREEIGMPRRTSYPHDSALIHDDNTVSLGQVRLHPLL        |
| Enteropathogenic E.coli (EPEC)     | LLLEEARTVGLGAFSEEVLSENKFREEIGMPRRTSYPHDSALIHDDNTVSLGQVRLHPLL        |
| Escherichia_albertii               | LLLEEARTVGLGAFSEEVLSENKFREEIGMPRRTSYPHDSALIHDDNTVSLGQVRLHPLL        |
| Providencia_alcalifaciens          | LLLEEARTVGLGAFSEEVLSENKFREEIGIPRRTSYPHDSALIHDDNTVSLGQVRLHPLL        |
| Izhakiella_capsodis                | LLLEEARTVGLGAFSEEVLSENKFRVEIGIPRRTFYSHDLAIHDDNTVTQGFQRRKHLHPLL      |
| Salmonella_enterica_arizonae (SEA) | FLLEEARTVGLGSFSEEVLSENKFREEIGVPRRTFYPRDLYIHDDNTVTQGLQRKHLHPLL       |
| Pantoea_stewartii                  | LLLEEARTVGLGAFSEEVLSENKFREEIGVPRRTFYPHDSSLIHDDNTVTQGFQRRKHLHPLL     |
| Salmonella_enterica_Sandiego       | FLLEEARTVGLGSFSEEVLSENKFREEIGVPRRTFYPHNSLIHDDNTVVSQGFQRRKHLHPLL     |
| Leclercia                          | LLLEEARTVWLGAFSEEVLSENKFREEIGMPRRTFYPRDSSLIHDDNTVTQGFQRRKHLHPLL     |
| Salmonella_enterica_Braenderup     | LLLEEARTVGLGAFSEEVLSKFREEIGMPRRTFYPHDSSLIHDDNTVTQGFQRRKHLHPLL       |
| Salmonella_enterica_salamae        | LLLEEARTVGLGAFSEEVLSENKFREEIGMPRRTFYPHDSSLIHDDNTVTQGFQRRKHLHPLL     |
| Citrobacter_rodentium (CR)         | LLLEEARTVGLGAFSEEVLSENKFREEIGMPRRTFYPHDSSLIHDDNTVTQGFQRRKHLHPLL     |
| Erwinia_tracheiphila               | LLLEEARTVGLGAFSEEVLSENKFREEIGMPRRTFYPHDSSLIHDDNTVTQGFQRRKHLHPLL     |
|                                    | :*****: ** **** :**:*: ** * * * * : : : : : * : : : : * : : * * * * |

**Figure S1. NleD ortholog protein sequences.** NleD protein sequences, as determined by PSI-Blast search results (NCBI). Sequences were aligned using Clustal Omega (Sievers et al., 2011). The HELLH Zn-metalloprotease motif is encircled in green. An asterisk (\*) indicates a fully conserved residue. A colon (: ) and a period (.) indicates conservation of strongly similar and weakly similar properties respectively.



**Table S1**– Bacterial strains used in this study. The strain name in our collection is brackets.

| <b>Name</b>   | <b>Description</b>                                                                                          | <b>Reference or source</b> |
|---------------|-------------------------------------------------------------------------------------------------------------|----------------------------|
| E2348/69      | EPEC wild-type, strain E2348/69                                                                             | James Kaper                |
| KB4298        | E2348/69 $\Delta nleD::kan$                                                                                 | (Baruch et al., 2011)      |
| BL21(DE3)     | F-, <i>ompT</i> , <i>hsdS</i> $\beta$ ( $r\beta$ - $m\beta$ -), <i>dcm</i> , <i>gal</i> , (DE3) <i>tonA</i> | Novagen                    |
| KB4583        | <i>Salmonella enterica</i> serovar Arizona (SEA) strain CDC346-86 SARC5                                     | ATCC                       |
| ICC168 (4368) | <i>Citrobacter rodentium</i>                                                                                | Gad Frankel                |
| Rosetta       | <i>E. coli</i> strain Rosetta                                                                               | Novagen                    |

**Table S2:** Plasmids used in this study

| Name                      | Description                                                                                                                                                          | Reference or source | Name in our collection |
|---------------------------|----------------------------------------------------------------------------------------------------------------------------------------------------------------------|---------------------|------------------------|
| JNK2                      | pET28a, bacterial expression vector encoding hexa-His tag JNK2                                                                                                       | David Engelberg     | pLG4470                |
| p38 $\alpha$              | pET28a, bacterial expression vector encoding hexa-His tag p38 $\alpha$                                                                                               | This study          |                        |
| ERK2                      | pET15b, bacterial expression vector encoding hexa-His tag ERK2                                                                                                       | David Engelberg     | pLG4472                |
| NleD                      | pET28a, bacterial expression vector encoding hexa-His tag truncated <i>nleD</i> <sub>EPEC 19-232</sub>                                                               | This study          | pLG6728                |
| ERK <sub>A</sub> -JNK     | pET15b, bacterial expression vector encoding ERK2 with JNK2 activation loop (residues 169-188 from JNK2)                                                             | This study          | pLG6725                |
| ERK <sub>A</sub> -p38     | pET15b, bacterial expression vector encoding ERK2 with p38 $\alpha$ activation loop (residues 167-185 from p38 $\alpha$ )                                            | This study          | pLG6726                |
| p38 <sub>A</sub> -ERK     | pET28a, bacterial expression vector encoding p38 $\alpha$ with ERK2 activation loop (residues 164-188 from ERK2)                                                     | This study          | pLG6727                |
| ERK <sub>G</sub> -p38     | pET15b, bacterial expression vector encoding ERK2 with G-helix from p38 $\alpha$ (residues 223-229 from p38 $\alpha$ )                                               | This study          |                        |
| ERK <sub>G</sub> -JNK     | pET15b, bacterial expression vector encoding ERK2 with G-helix from JNK2 (residues 225-231 from JNK2)                                                                | This study          |                        |
| ERK <sub>G,M,L</sub> -p38 | pET15b, bacterial expression vector encoding ERK2 with G-helix, MKI and L16 from p38 $\alpha$ (residues 223-229, 243-262, 327-333, respectively, from p38 $\alpha$ ) | This study          |                        |
| ERK <sub>G,M,L</sub> -JNK | pET15b, bacterial expression vector encoding ERK2 with G-helix, MKI and L16 from JNK2 (residues from 225-231, 245-262, 342-348, respectively, from JNK2)             | This study          |                        |
| ERK <sub>F</sub> -p38     | pET15b, bacterial expression vector encoding ERK2 with $\alpha$ EF/ $\alpha$ F loop from p38 $\alpha$ (residues 196-202 from p38 $\alpha$ )                          | This study          |                        |
| ERK <sub>G,F</sub> -p38   | pET15b, bacterial expression vector encoding ERK2 with $\alpha$ EF/ $\alpha$ F loop and G-helix from p38 $\alpha$ (residues                                          | This study          |                        |

|                                  |                                                                                                     |                                    |         |
|----------------------------------|-----------------------------------------------------------------------------------------------------|------------------------------------|---------|
|                                  | 196-202 and 223-229, respectively, from p38 $\alpha$ )                                              |                                    |         |
| ERK <sub>G,F,M,L-p38</sub>       | pET15b, bacterial expression vector encoding ERK2 containing ERtrp38+ ER $\alpha$ EF/ $\alpha$ Fp38 | This study                         |         |
| p38 $\alpha$ D316N               | pET28a, bacterial expression vector encoding hexa-His tag p38 $\alpha$ with D316N                   | Lab collection                     |         |
| pET28a                           | Bacterial expression vector                                                                         | Novagen                            | pLG4483 |
| NleD EPEC                        | pET28a, bacterial expression vector encoding <i>nleD</i> <sub>EPEC</sub>                            | This study                         | pLG4480 |
| pSA10                            | pKK177-3 derivative containing <i>lacI</i> <sup>q</sup> . bacterial expression vector.              | (Schlosser-Silverman et al., 2000) | 1060    |
| NleD EPEC                        | pSA10, bacterial expression vector encoding <i>nleD</i> <sub>EPEC</sub>                             | (Baruch et al., 2011)              | pKB4345 |
| NleD CR1                         | pSA10, bacterial expression vector encoding <i>nleD1</i> <sub>CR</sub>                              | This study                         | pKB4505 |
| NleD CR2                         | pSA10, bacterial expression vector encoding <i>nleD2</i> <sub>CR</sub>                              | This study                         | pKB4506 |
| NleD SEA                         | pSA10, bacterial expression vector encoding <i>nleD</i> <sub>SEA</sub>                              | This study                         | pSK4611 |
| NleD HD                          | pSA10, bacterial expression vector encoding <i>nleD</i> <sub>HD</sub>                               | This study                         | pSK4702 |
| GST-7Ala-GFP                     | pGEX2T, bacterial expression vector encoding GST – 7 alanine loop – GFP                             | This study                         | pLG5088 |
| GST- JNK <sub>169-192</sub> -GFP | pGEX2T, bacterial expression vector encoding GST –JNK2 <sub>D169 – R192</sub> – GFP                 | This study                         | pKB4699 |
| GST- JNK <sub>176-192</sub> -GFP | pGEX2T, bacterial expression vector encoding GST –JNK2 <sub>A176 – R192</sub> – GFP                 | This study                         | pLG5011 |
| GST- JNK <sub>180-192</sub> -GFP | pGEX2T, bacterial expression vector encoding GST –JNK2 <sub>F180 – R192</sub> – GFP                 | This study                         | pLG5102 |
| GST- JNK <sub>176-188</sub> -GFP | pGEX2T, bacterial expression vector encoding GST –JNK2 <sub>A176 – T188</sub> – GFP                 | This study                         | pLG5101 |
| GST- JNK <sub>180-186</sub> -GFP | pGEX2T, bacterial expression vector encoding GST –JNK2 <sub>F180 – V186</sub> – GFP                 | This study                         | pLG5086 |
| GST- JNK <sub>182-188</sub> -GFP | pGEX2T, bacterial expression vector encoding GST –JNK2 <sub>M182 – T188</sub> – GFP                 | This study                         | pLG5087 |
| GST- ERK <sub>A</sub> -GFP       | pGEX2T, bacterial expression vector encoding GST–ERK1 <sub>183-217</sub> – GFP                      | This study                         | pLG5103 |
| JNK2                             | pGEX2T, bacterial expression vector encoding hexa-His tag JNK2                                      | This study                         | pLG4901 |

|                                |                                                                                                        |                 |         |
|--------------------------------|--------------------------------------------------------------------------------------------------------|-----------------|---------|
| JNK2 P184E                     | pGEX2T, bacterial expression vector encoding hexa-His tag JNK2 mutant P184E                            | This study      | pLG5186 |
| p38 $\beta$                    | pET28a, bacterial expression vector encoding hexa-His tag p38 $\beta$                                  | David Engelberg | pLG4495 |
| ERK1                           | pET28a, bacterial expression vector encoding hexa-His tag ERK1                                         | This study      | pLG4774 |
| JNK1                           | pSR $\alpha$ 3, mammalian expression vector encoding HA-JNK1,                                          | Eitan Shaulian  | pLG4487 |
| JNK2                           | pSR $\alpha$ 3, mammalian expression vector encoding HA-JNK2                                           | Eitan Shaulian  | pLG4488 |
| p38 $\alpha$                   | pcDNA3, mammalian expression vector encoding HA-p38 $\alpha$                                           | David Engelberg | pLG4683 |
| p38 $\beta$                    | pcDNA3, mammalian expression vector encoding HA-p38 $\beta$                                            | David Engelberg | pLG4684 |
| p38 $\gamma$                   | pcDNA3, mammalian expression vector encoding HA-p38 $\gamma$                                           | David Engelberg | pLG4685 |
| p38 $\delta$                   | pcDNA3, mammalian expression vector encoding HA-p38 $\delta$                                           | David Engelberg | pLG4686 |
| ERK1                           | pcEFL, mammalian expression vector encoding hexa-His ERK1                                              | David Engelberg | pLG4675 |
| ERK2                           | pcEFL, mammalian expression vector encoding HA-ERK2                                                    | David Engelberg | pLG4676 |
| JNK2 D326A                     | pSR $\alpha$ 3, mammalian expression vector encoding HA-JNK2 with D326A mutation                       | This study      | pLG6680 |
| JNK2 E329A                     | pSR $\alpha$ 3, mammalian expression vector encoding HA-JNK2 with E329A mutation                       | This study      | pLG6681 |
| JNK2 E331A                     | pSR $\alpha$ 3, mammalian expression vector encoding HA-JNK2 with E331A mutation                       | This study      | pLG6682 |
| JNK2 D326A/<br>E329A/<br>E331A | pSR $\alpha$ 3, mammalian expression vector encoding HA-JNK2 with the mutations D326A, E329A and E331A | This study      | pLG6683 |

**Table S3** – The primers used in this study

| Plasmid number | Primer sequence                            |
|----------------|--------------------------------------------|
| pLG4480        | CAGAATCATATGCGCCCTACGTCCCTC                |
|                | AGAATTCAGCTAAAGCAATGGATGCAG                |
| pLG4901        | CggatccATGAGCGACAGTAAATGTG                 |
|                | GGAATTCTCATCGACAGCCTTCAAGG                 |
| pLG5011        | CAGGGATCCGCGTGCACCTAATTCATGATGACCCCTTACGT  |
|                | GGTGACACGGTACTACCGGATGGTGAGCAAGGGCGAG      |
| pLG5086        | CCAGAATTCTTACTTGTACAGCTCGTCCATG            |
|                | CAGGGATCCTTCATGATGACCCCTTACGTGATGGTGAGCAA  |
| pLG5087        | GGGCGAG                                    |
|                | CCAGAATTCTTACTTGTACAGCTCGTCCATG            |
| pLG5088        | CAGGGATCCATGACCCCTTACGTGGTGACAATGGTGAGCAA  |
|                | GGGCGAG                                    |
| pLG5101        | CCAGAATTCTTACTTGTACAGCTCGTCCATG            |
|                | CAGGGATCCGCGTGCACCTAATTCATGATGACCCCTTACGT  |
| pLG5102        | GGTGACAATGGTGAGCAAGGGCGAG                  |
|                | CCAGAATTCTTACTTGTACAGCTCGTCCATG            |
| pLG5103        | CAGGGATCCTTCATGATGACCCCTTACGTGGTGACACGGTA  |
|                | CTACCGGATGGTGAGCAAGGGCGAG                  |
| pLG5103        | CCAGAATTCTTACTTGTACAGCTCGTCCATG            |
|                | CAGGGATCCTGTGATTTGCGCCTGGCCCGGATTGCCGATCC  |
| pSK4702        | TGAGCATGACCACACCGGCTTCTGACGGAGTATGTGGCTA   |
|                | CGCGCTGGATGGTGAGCAAGGGCGAG                 |
| pLG5186        | CCAGAATTCTTACTTGTACAGCTCGTCCATG            |
|                | CCAGAATTCTTACTTGTACAGCTCGTCCATG            |
| pSK4611        | ATCGGACCCGGGATGCGGCGTGCTCTTAAAC            |
|                | AAATGCATTTATTCACGAAGCAGTGGATGTG            |
| pKB4505        | CACTAATTCATGATGACCGAATACGTGGTGACACGGTAC    |
|                | GTACCGTGTCACCACGTATTCGGTCATCATGAAGTTAGTG   |
| pKB4506        | AGCGTCGACATGCGTCCTACATCCCTTAAAC            |
|                | CAGCATGCTAGCTAAAGTAATGGATGCAG              |
| pKB4699        | AGAATTCCTTAATGCGCCCTACATCCC                |
|                | ACCGTCGACCAACGTAGCTAAAGTAACGG              |
| pLG6728        | AGAATTCATGGTATTTTCAGCCAAACC                |
|                | ACCGTCGACCAACGTAGCTAAAGTAACGG              |
| pKB4699        | CAGGGATCCATGCTTGACTTTGGCCTGGCCCGGACAGCGTG  |
|                | CACTAATTCATGATGACCCCTTACGTGGTGACACGGTACT   |
| pLG6728        | ACCGGATGGTGAGCAAGGGCGAG                    |
|                | CCAGAATTCTTACTTGTACAGCTCGTCCATG            |
| pLG6728        | ATGTCAGATACAGATATCGAGTCTCTTGTA AAAAG       |
|                | GCCCTGAAAATACAGGTTTTTCGTGATGATGATGATGATGGC |
|                | TGC                                        |

|         |                                                                     |
|---------|---------------------------------------------------------------------|
| pLG6725 | TTCATGATGACACCATATGTGGTCACACGTTATTACAGAGC<br>TCCAGAAATTATGTTGAATTCC |
|         | ATTTGTACATGCGGTACGGGCCAGGCCAAAGTCCAAGATCT<br>TGAGATCACAAGTGGTGTTCAG |
| pLG6726 | CATACAGACGACGAAATGACAGGATATGTAGCCACGCGTT<br>GGTACAGAG               |
|         | ACGGGCAAGGCCAAAGTCCAAGATCTTGAGATCACAAGTG<br>GTGTTCAG                |
| pLG6727 | GATCCAGACCATGATCATACAGGGTTCTTGACAGAGTACGT<br>GGCCACTAGGTGGTACAGG    |
|         | TGCAACCCGAGCCAGTCCAAAATCACAAATCTTCAGCTCAC<br>AGTCTTCATTACAG         |
| pLG6680 | GTATGCCCCCGCCGAAGCAGAAGC                                            |
|         | CGGGGGCATAACAAACAGTGATGTATGGG                                       |
| pLG6681 | CGCCGCAGCAGAAGCCCCACCACC                                            |
|         | CTGCTGCGGCGGGGTCATAACAAAC                                           |
| pLG6682 | AGCAGCAGCCCCACCACCTCAAATTTATG                                       |
|         | GGGCTGCTGCTTCGGCGGGGTCATAC                                          |
| pLG6683 | CCCCCGCCGCAGCAGCAGCCCCACCACCTCAAATTTATG                             |
|         | GCTGCTGCGGCGGGGGCATAACAAACAGTGATGTATGGGT<br>G                       |
|         |                                                                     |

## References

- Baruch, K., Gur-Arie, L., Nadler, C., Koby, S., Yerushalmi, G., Ben-Neriah, Y., Yogeve, O., Shaulian, E., Guttman, C., Zarivach, R., *et al.* (2011). Metalloprotease type III effectors that specifically cleave JNK and NF-kappaB. *The EMBO journal* 30, 221-231.
- Schlosser-Silverman, E., Elgrably-Weiss, M., Rosenshine, I., Kohen, R., and Altuvia, S. (2000). Characterization of *Escherichia coli* DNA lesions generated within J774 macrophages. *Journal of bacteriology* 182, 5225-5230.
- Sievers, F., Wilm, A., Dineen, D., Gibson, T.J., Karplus, K., Li, W., Lopez, R., McWilliam, H., Remmert, M., Soding, J., *et al.* (2011). Fast, scalable generation of high-quality protein multiple sequence alignments using Clustal Omega. *Molecular systems biology* 7, 539.
